# Supplementary material
Source: MDPI journal article supplement (https://www.mdpi.com/1999-4907/10/1/69)
Supplement: s1 [file s1]

Archive with 2 entries (2 files):
- ANNEX Logging Company Survey.pdf
- Supplementary materials.pdf
