# Supplementary material
Source: MDPI journal article supplement (https://www.mdpi.com/1999-4907/10/1/69)
Supplement: s1 [file s1 › ANNEX Logging Company Survey.pdf]

## **ANNEX Logging Company Survey**

Survey for the characterization of wood harvest contractors. This survey will allow the collection of data for a characterization of the work situations of forest harvest service companies. This survey will be conducted simultaneously in Argentina, Brazil, and Uruguay.

Company Name:

Name and Position of the interviewed:

Work Region:

Date:     /     /200\_

### **A. COMPANY DESCRIPTION**

#### **1. Service sector:**

- |                                     |                                                      |
|-------------------------------------|------------------------------------------------------|
| <input type="checkbox"/> Harvesting | <input type="checkbox"/> Plantation and silviculture |
| <input type="checkbox"/> Transport  | <input type="checkbox"/> Others                      |

#### **2. Species (the most important)**

- |                                     |                                         |                                     |
|-------------------------------------|-----------------------------------------|-------------------------------------|
| <input type="checkbox"/> Eucalyptus | <input type="checkbox"/> Pinus          | <input type="checkbox"/> Araucarias |
| <input type="checkbox"/> Broadleaf  | <input type="checkbox"/> Willow/ Poplar |                                     |

Operations:

#### **3. Felling**

(Machine model and quantity in each case)

- |                                                |                                                                 |
|------------------------------------------------|-----------------------------------------------------------------|
| <input type="checkbox"/> chainsaw              | <input type="checkbox"/> Bush cleaning                          |
| <input type="checkbox"/> crawler harvester     | <input type="checkbox"/> rubber tire harvester                  |
| <input type="checkbox"/> feller buncher (disk) | <input type="checkbox"/> feller buncher (shears)                |
| <input type="checkbox"/> feller (chainsaw)     | <input type="checkbox"/> Crawler excavator plus harvesting head |
| <input type="checkbox"/> Others                |                                                                 |

#### 4. Processing

(Machine model and quantity in each case)

- |                                               |                                               |
|-----------------------------------------------|-----------------------------------------------|
| <input type="checkbox"/> manual, axe          | <input type="checkbox"/> chainsaw             |
| <input type="checkbox"/> mechanized processor | <input type="checkbox"/> slasher              |
| <input type="checkbox"/> manual debarking     | <input type="checkbox"/> mechanized debarking |
| <br><input type="checkbox"/> Others           |                                               |

#### 5. Logging

(Machine model and quantity in each case)

- |                                                                |                                        |
|----------------------------------------------------------------|----------------------------------------|
| <input type="checkbox"/> Animal logging                        |                                        |
| <input type="checkbox"/> Farm Tractor                          | <input type="checkbox"/> Mini skidder  |
| <br><input type="checkbox"/> Agricultural Tractor with trailer |                                        |
| <input type="checkbox"/> Grapple Skidder                       | <input type="checkbox"/> Winch Skidder |
| <input type="checkbox"/> Forwarder                             | <input type="checkbox"/> Klenbunk      |
| <input type="checkbox"/> Cable Yarding                         | <input type="checkbox"/> Others        |

#### 6. Loading

(Machine model and quantity in each case)

- |                                               |                                                 |
|-----------------------------------------------|-------------------------------------------------|
| <input type="checkbox"/> Agricultural Tractor | <input type="checkbox"/> Bell three tire logger |
| <input type="checkbox"/> Crawler excavator    | <input type="checkbox"/> Truck loader           |

☐ Front loader

☐ Sorting and/or piling

## 7. Transport

(Machine model and quantity in each case)

☐ Track and trailer 30 t

☐ Truck and trailer 45 t

☐ Semitrailer truck up to 30 t

☐ Semitrailer truck up to 45 t

☐ Others

## B ECONOMIC COMPANY INDICATORS

8. Number of worker ( )

9 How many technician work in your Company? ( )

10 How many University professionals work in your Company? ( )

11 Which is the company average monthly production in ton? ( )

12. Annual Sales, in US\$

☐ up to 50,000

☐ up to 100,000.00

☐ from 100,000.01 to 250,000.00

☐ from 250,000.01 to 500,000

☐ from 500,000 to 1,000,000.00

☐ from 1,000,000.01 to 1,500,000.00

☐ from 1,500,000 to 2,000,000.00

☐ from 2,000,000.01 to 2,500,000.00

☐ from 2,500,000.01 to 5,000,000.00

☐ from 5,000,000.01 to 7,500,000.00

☐ from 7,500,000.01 to 10,000,000.00

☐ more than 10,000,000.01

13. Logging cost at the landing area in US\$

- ☐ 1 to 2                      ☐ 2.1 to 3                      ☐ 3.1 to 4                      ☐ 4.1 to 5                      ☐ 5.1 to 7  
☐ 7.1 to 9                      ☐ 9.1 to 11                      ☐ 11.1 to 13                      ☐ 13.1 to 15                      ☐ more than 15

14. EBTA (%)

- ☐ less than 5%                      ☐ 5 to 10%                      ☐ 10 to 20%                      ☐ 20 to 30%  
☐ more than 30%

15. Company profit

- ☐ Negative                      ☐ 1 to 5%                      ☐ 10% ☐ 15 %                      ☐ 20%  
☐ more than 20%

16. How do you develop your management?

- ☐ Don't know                      ☐ Excel spreadsheet                      ☐ Management soft (general)  
☐ Forest management soft

17. Do you know the ABC cost method?

- Yes ☐                                              No ☐

18. If positive, which ones are your cost center and your values in US\$/ton?

- Cost and road side ☐                      Logistic and camp cost ☐  
Infrastructure cost ☐                      Maintenance cost ☐  
Administrative cost ☐

19. Which one of the following financial indicators do you usually use, and which were your results?

IRR ( )

Liquid Profit ( )

Active Turnover ( )

#### C. CONTRACTING COMPANY RELATIONSHIP

20. With how many companies do you work? Would you listed?

( ) One

( ) Two

( ) Three

( ) Four

( ) Five

( ) More than five

21. Type of contracting company

( ) Sawmill

( ) Cellulosic

( ) Pulp and paper

( ) Forest owner

( ) MDF or Board Mill

( ) Cooperative / Owners Association

( ) Government

( ) Veneer

( ) Others

22. How do you evaluate your relationships with the contracting Company?

( ) Bad

( ) Complicated

( ) Good

( ) Very good

23. is the contracting Company certified? Which system?

( ) FSC

( ) Cerflor

( ) Certfor

( ) SFI

( ) ISO 14000

( ) ISO 9000

( ) OSHAS

24. Company age, years:

( ) less than 1

( ) 1 to 2

( ) 2 to 5

( ) 5 to 10

( ) 10 to 20

( ) 20 to 30

( ) 30 to 50

( ) more than 50



#### D. LOGGING COMPANY EVOLUTION

31. How much does your Company grow in the last 10 years?

- ☐ Nothing                      ☐ Decrease                      ☐ 10% ☐ 11 to 20 %  
☐ 21 to 30 %   ☐ 31 to 50 %   ☐ 50 to 75%   ☐ 75% to 100%  
☐ 100 to 150% ☐ 151 to 200% ☐ 200 to 300% ☐ more than 300%

32. How many workers does your Company has 5 and 10 years ago?

5 years (     )                      10 years (     )

33. How many high technology machines does your Company has 5 and 10 years ago?

Felling:

5 years (     )                      10 years (     )

Logging:

5 years (     )                      10 years (     )

Loading:

5 years (     )                      10 years (     )

Transport:

5 years (     )                      10 years (     )

34. What was your average monthly production 5 years ago?

- ☐ up to 3,000                                      ☐ up to 5,000  
☐ up to 10,000                                      ☐ up to 15,000  
☐ up to 20,000                                      ☐ up to 30,000  
☐ up to 50,000                                      ☐ up to 100,000  
☐ more than 100,000

35. What was your average monthly production 5 years ago?

- |                                            |                                        |
|--------------------------------------------|----------------------------------------|
| <input type="checkbox"/> up to 3,000       | <input type="checkbox"/> up to 5,000   |
| <input type="checkbox"/> up to 10,000      | <input type="checkbox"/> up to 15,000  |
| <input type="checkbox"/> up to 20,000      | <input type="checkbox"/> up to 30,000  |
| <input type="checkbox"/> up to 50,000      | <input type="checkbox"/> up to 100,000 |
| <input type="checkbox"/> more than 100,000 |                                        |

#### E. COMPANY PROJECTION

36. Which are your Company expects?

- |                                             |                                             |                                                   |
|---------------------------------------------|---------------------------------------------|---------------------------------------------------|
| <input type="checkbox"/> More production    | <input type="checkbox"/> more mechanization | <input type="checkbox"/> less costs               |
| <input type="checkbox"/> More clients       | <input type="checkbox"/> Diversify business | <input type="checkbox"/> More professionalization |
| <input type="checkbox"/> Improve management |                                             |                                                   |

37. Do you want to add any comment about logging contractor work or the issues asked in this survey?

38. Do you want to receive the results and/or summary of this survey?
