# Supplementary material
Source: MDPI journal article supplement (https://www.mdpi.com/1999-4907/10/1/69)
Supplement: s1 [file s1 › Supplementary materials.pdf]

## Supplementary materials

**Table S1.** Conditional index and proportion of variance-decomposition of continuous predictors variables used to construct production models.

| <b>Conditional Index</b> | <b>Age</b> | <b>N° Employees</b> | <b>Capital</b> | <b>Business</b> | <b>Innovation</b> |
|--------------------------|------------|---------------------|----------------|-----------------|-------------------|
| 1.000                    | 0.064      | 0.000               | 0.039          | 0.100           | 0.101             |
| 1.202                    | 0.029      | 0.344               | 0.222          | 0.005           | 0.004             |
| 1.509                    | 0.816      | 0.000               | 0.039          | 0.069           | 0.048             |
| 1.802                    | 0.089      | 0.574               | 0.592          | 0.063           | 0.009             |
| 2.563                    | 0.003      | 0.080               | 0.108          | 0.762           | 0.838             |

**Table S2.** Conditional index and proportion of variance-decomposition of continuous predictors variables used to construct growth models for different time periods.

| <b>Period</b>     | <b>Conditional Index</b> | <b>N° Employees</b> | <b>Capital</b> | <b>Business</b> | <b>Innovation</b> |
|-------------------|--------------------------|---------------------|----------------|-----------------|-------------------|
| Last five years   | 1.000                    | 0.004               | 0.067          | 0.135           | 0.139             |
|                   | 1.165                    | 0.372               | 0.209          | 0.028           | 0.018             |
|                   | 1.615                    | 0.488               | 0.509          | 0.160           | 0.010             |
|                   | 2.327                    | 0.136               | 0.215          | 0.677           | 0.833             |
| Five to ten years | 1.000                    | 0.078               | 0.078          | 0.084           | 0.084             |
|                   | 1.297                    | 0.166               | 0.168          | 0.112           | 0.111             |
|                   | 2.054                    | 0.722               | 0.719          | 0.023           | 0.023             |
|                   | 2.324                    | 0.034               | 0.035          | 0.782           | 0.782             |
| Last ten years    | 1.000                    | 0.077               | 0.008          | 0.113           | 0.091             |
|                   | 1.148                    | 0.090               | 0.242          | 0.028           | 0.041             |
|                   | 1.964                    | 0.313               | 0.202          | 0.558           | 0.104             |
|                   | 2.732                    | 0.520               | 0.548          | 0.301           | 0.764             |
